# Supplementary material
Source: PubMed Central journal article supplement (PMC3486072)
Supplement: JB.00666-12_zjb999092074so1.pdf [file JB.00666-12_zjb999092074so1.pdf]

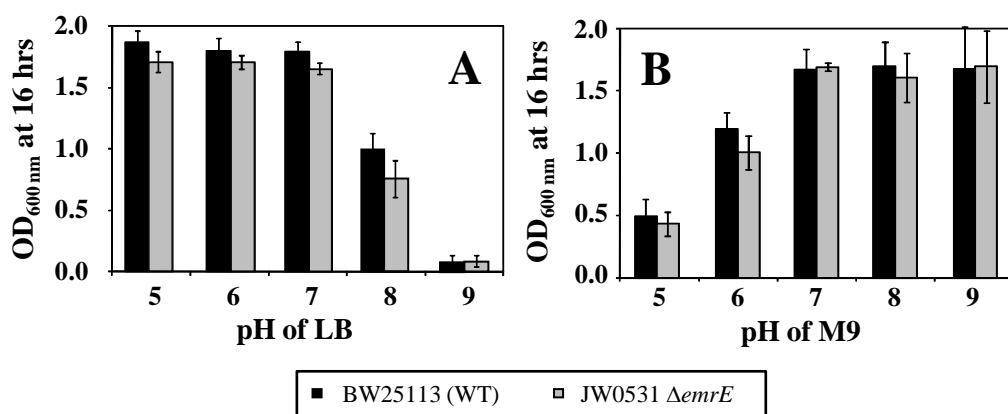

**Supplementary Figure 1.** pH susceptibility of *E. coli* BW25113 and JW0531 strains. Mean OD<sub>600nm</sub> values after 16 hrs of growth are presented for each *E. coli* strain cultured in either LB (A) or M9 (B) media at pH values of 5-9. In both panels *E. coli* strains BW25113 (wildtype; black) and JW0531 ( $\Delta emrE$ ; grey) are shown in bar chart format.

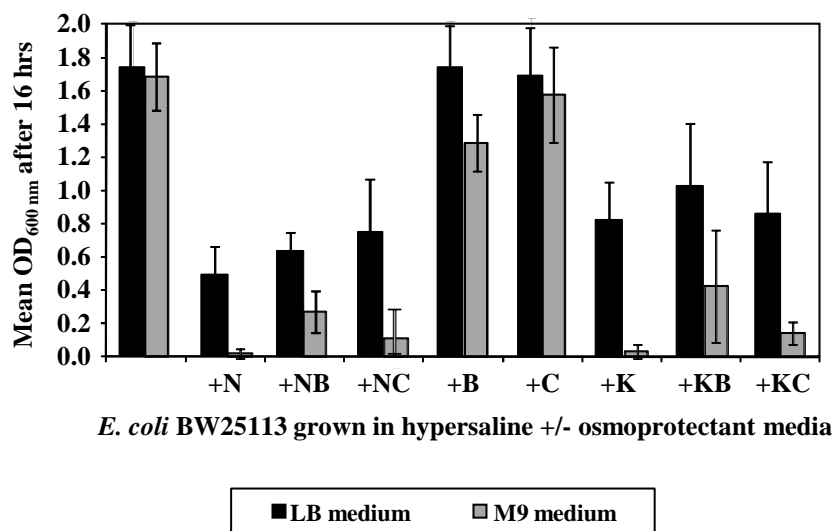

**Supplementary Figure 2.** Hypersaline screening assay of untransformed *E. coli* BW25113 control strain grown the presence of osmoprotectants betaine and choline. The mean OD<sub>600 nm</sub> (y-axis) of BW25113 strains grown in either LB (black) or M9 media (grey) for 16 hrs in the presence and absence of 1.0 M NaCl (N) or KCl (K) and 10 mM osmoprotectants, betaine (B) or choline (C).

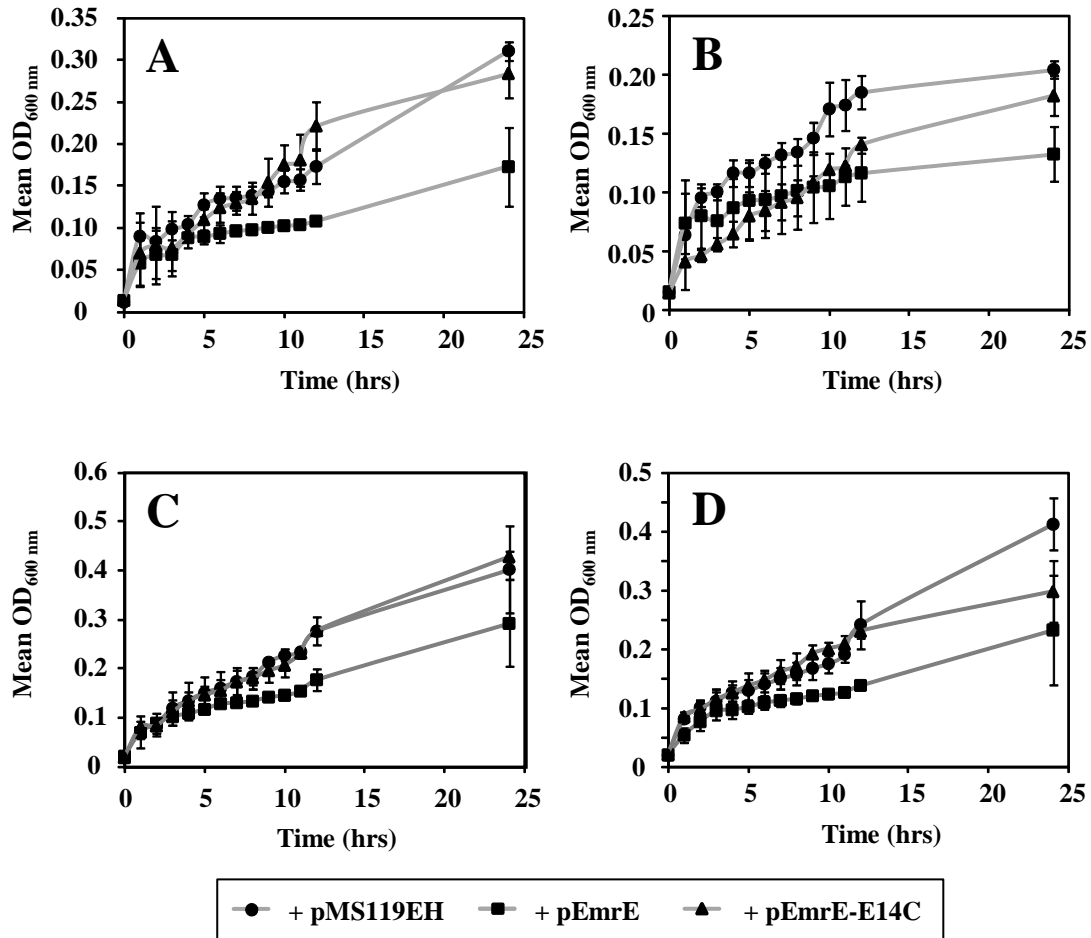

**Supplementary Figure 3.** Hypersaline growth susceptibility curves of *emrE* plasmid transformed *E. coli* BW25113. Mean OD<sub>600 nm</sub> over 24 hrs of growth in hypersaline M9 media at 1.0 M NaCl (A-B) or KCl (C-D) in the presence of 10 mM osmoprotectants betaine (A-B) or choline (C-D). In all panels, OD<sub>600 nm</sub> values are shown for *E. coli* BW25113 transformed with pMS119EH (black circle), pEmrE (light grey square) or pEmrE-E14C (dark grey triangle).

**Supplementary Table 1.** A summary of SMR plasmids designed and the primers used for gene cloning and site-directed mutagenesis in this study.

| Vector                              | SMR gene cloned | SMR gene mutation                                                  | NCBI gene locus tag | Primers used for SMR gene amplification or mutagenesis                                                                                                                                                                                                                                                                                   |
|-------------------------------------|-----------------|--------------------------------------------------------------------|---------------------|------------------------------------------------------------------------------------------------------------------------------------------------------------------------------------------------------------------------------------------------------------------------------------------------------------------------------------------|
| pMS119EH                            | —               | —                                                                  | —                   | —                                                                                                                                                                                                                                                                                                                                        |
| pEmrE                               | <i>emrE</i>     | —                                                                  | b0531               | Forward<br>5' ATATTCTAGAAGGAGAAATAATATGAACCCTTAT<br>ATTTATCTTGG 3'<br>Reverse<br>5' TATAAAGCTTTTAATGTGGTGTGCTTCGTGAC 3'                                                                                                                                                                                                                  |
| pEmrE-E14C                          | <i>emrE</i>     | E14C                                                               | b0531               | Forward<br>5' CTTGGTGGTGCAATACTTGCATGTGTCATTGGTA<br>CAACC 3'<br>Reverse<br>5' GGTGTACCAATGACACATGCAAGTATTGCACCA<br>CCAAG 3'                                                                                                                                                                                                              |
| pEmrE- <i>myc</i> -His <sub>6</sub> | <i>emrE</i>     | C-terminal<br><i>myc</i><br>epitope<br>and His <sub>6</sub><br>tag | b0531               | Forward<br>5' ATATTCTAGAAGGAGAAATAATATGAACCCTTAT<br>ATTTATCTTGG 3'<br>Reverse-1<br>5' TATAAAGCTTTTAATAAGCCTCGAACTCGAGATG<br>TGGTGTGCTTCGTGAC 3'<br>Reverse-2<br>5' TATAAAGCTTTTATAAGTCCTCTTCGCTAATTA<br>CTTCTGCTCATAAGCCTCGAACTCGAGATG 3'<br>Reverse-3<br>5' ATATAAGCTTTTAGTGATGGTGATGGTGATGGTC<br>GACAGCGCTATTTAAGTCCTCTTCGCTAATTAAC 3' |

**Supplementary Table 2.** *E. coli* K12 strains used for this study.

| <i>E. coli</i> strain* | SMR gene deletion | Genotype                                                                                                                                                                                         | Resistance | Reference |
|------------------------|-------------------|--------------------------------------------------------------------------------------------------------------------------------------------------------------------------------------------------|------------|-----------|
| BW25113                | —                 | F-, $\Delta(\text{araD-araB})567$ , $\Delta\text{lacZ4787}>::\text{rrnB-3}$ , $\lambda$ -, <i>rph-1</i> , $\Delta(\text{rhaD-rhaB})568$ , <i>hsdR514</i>                                         | —          | (1)       |
| JW0531                 | <i>emrE</i>       | F-, $\Delta(\text{araD-araB})567$ , $\Delta\text{lacZ4787}>::\text{rrnB-3}$ , $\Delta\text{emrE750}>::\text{kan}$ , & $\lambda$ -, <i>rph-1</i> , $\Delta(\text{rhaD-rhaB})568$ , <i>hsdR514</i> | kanamycin  | (1)       |
| JW0303                 | <i>betA</i>       | F-, $\Delta(\text{araD-araB})567$ , $\Delta\text{lacZ4787}>::\text{rrnB-3}$ , $\lambda$ -, <i>rph-1</i> , $\Delta(\text{rhaD-rhaB})568$ , $\Delta\text{betA753}>::\text{kan}$ , <i>hsdR514</i>   | kanamycin  | (1)       |
| JW0304                 | <i>betB</i>       | F-, $\Delta(\text{araD-araB})567$ , $\Delta\text{lacZ4787}>::\text{rrnB-3}$ , $\lambda$ -, <i>rph-1</i> , $\Delta(\text{rhaD-rhaB})568$ , $\Delta\text{betB754}>::\text{kan}$ , <i>hsdR514</i>   | kanamycin  | (1)       |

\*All strains used in this study were provided by the Keio Collection of single-gene knockouts constructed through a collaboration of the Institute of Advanced Bioscience at Keio University, the Nara Institute of Science and Technology in Japan.

**Supplementary Table 3.** Average whole cell accumulation of EmrE-myc-His<sub>6</sub> protein (μg)/OD<sub>600 nm</sub> unit after 16 hrs growth at 37°C determined from Western dot blots of *E. coli* strains

BW25113 and JW0531 grown under varying pH and hypersaline conditions.

| <i>E. coli</i> Strain | Culture Medium | pH     | Salt (M) | Average EmrE-myc-His <sub>6</sub> protein (μg)/ OD <sub>600 nm</sub> unit |
|-----------------------|----------------|--------|----------|---------------------------------------------------------------------------|
| BW25113               | M9             | 5      | —        | 0.031 +/- 0.021                                                           |
|                       |                | 6      | —        | 0.022 +/- 0.008                                                           |
|                       |                | 7      | —        | 0.018 +/- 0.003                                                           |
|                       |                | 7      | 0.5 NaCl | 0.011 +/- 0.015                                                           |
|                       |                | 7      | 0.5 KCl  | 0.014 +/- 0.019                                                           |
|                       |                | 7      | 1.0 NaCl | ND                                                                        |
|                       |                | 7      | 1.0 KCl  | ND                                                                        |
|                       |                | 8      | —        | 0.020 +/- 0.003                                                           |
|                       |                | 9      | —        | 0.005 +/- 0.004                                                           |
| BW25113               | LB             | 5      | —        | 0.059 +/- 0.028                                                           |
|                       |                | 6      | —        | 0.037 +/- 0.016                                                           |
|                       |                | 7      | —        | 0.026 +/- 0.040                                                           |
|                       |                | 7      | 0.5 NaCl | 0.019 +/- 0.015                                                           |
|                       |                | 7      | 0.5 KCl  | 0.018 +/- 0.002                                                           |
|                       |                | 7      | 1.0 NaCl | 0.021 +/- 0.016                                                           |
|                       |                | 7      | 1.0 KCl  | 0.021 +/- 0.014                                                           |
|                       |                | 8      | —        | 0.017 +/- 0.010                                                           |
|                       |                | JW0531 | M9       | 5                                                                         |
| 6                     | —              |        |          | 0.015 +/- 0.003                                                           |
| 7                     | —              |        |          | 0.015 +/- 0.005                                                           |
| 7                     | 0.5 NaCl       |        |          | 0.011 +/- 0.004                                                           |
| 7                     | 0.5 KCl        |        |          | 0.012 +/- 0.018                                                           |
| 7                     | 1.0 NaCl       |        |          | ND                                                                        |
| 8                     | 1.0 KCl        |        |          | ND                                                                        |
| 9                     | —              |        |          | 0.021 +/- 0.001                                                           |
| JW0531                | LB             |        |          | 5                                                                         |
|                       |                | 6      | —        | 0.036 +/- 0.024                                                           |
|                       |                | 7      | —        | 0.029 +/- 0.020                                                           |
|                       |                | 7      | 0.5 NaCl | 0.007 +/- 0.004                                                           |
|                       |                | 7      | 0.5 KCl  | 0.026 +/- 0.016                                                           |
|                       |                | 7      | 1.0 NaCl | 0.007 +/- 0.004                                                           |
|                       |                | 7      | 1.0 KCl  | 0.028 +/- 0.003                                                           |
|                       |                | 8      | —        | 0.027 +/- 0.011                                                           |

\*ND, not determined due to insufficient cell growth under the defined condition.
